# Supplementary material for: Multilocus molecular systematics of the circumtropical reef-fish genus Abudefduf (Pomacentridae): history, geography and ecology of speciation
Source: PeerJ. 2018 Aug 14;6:e5357. doi: 10.7717/peerj.5357 (PMC6097498; doi:10.7717/peerj.5357)
Supplement: Table S1 — For each sample included in analyses the species name and unique identifier are given. We also indicate the collection information associated with each sample and how many contigs and UCEs were assembled, and if the sample was included in the Bayesian simultaneous divergence time estimation and phylogenetic inference analysis. [file peerj-06-5357-s001.xlsx]

## Sheet: UCES
Sample	Locality Data		Contigs	UCES	Included in Timetree?
Abudefduf-abdominalis-STRI-X-903	Hawaii	Kaneohe	1014	440	x
Abudefduf-abdominalis-STRI-X-898	Hawaii	Kaneohe	1321	431
Abudefduf-bengalensis-STRI-X-104	Taiwan	North Yehliu	641	359
Abudefduf-bengalensis-STRI-X-922	Australia	Great Barrier Reef-Lizard Island 2	493	368	x
Abudefduf-concolor-STRI-X-2096	Costa Rica	Bill Bussing Beach	159	126
Abudefduf-concolor-STRI-X-931	Galapagos	Bartolome	670	449	x
Abudefduf-concolor-STRI-X-932	Galapagos	Bartolome	529	426
Abudefduf-concolor-STRI-X-936	Galapagos	Bartolome	687	438
Abudefduf-concolor-STRI-X-974	Panama	Pachequillas	541	429
Abudefduf-concolor-STRI-X-983	Panama	Saboga	393	351
Abudefduf-conformis-MARQ088	Marquesas	Ua-Huka	945	420	x
Abudefduf-conformis-MARQ502	Marquesas	Ua-Huka	1476	414
Abudefduf-conformis-STRI-X-1481	Marquesas	Ua-Huka	2342	400
Abudefduf-declivifrons-STRI-X-1040	Mexico	San Ignacio	652	382	x
Abudefduf-declivifrons-STRI-X-1044	Mexico	San Ignacio	629	379
Abudefduf-lorenzi-STRI-X-1049	Papua New Guinea	Madang Lagoon	738	344
Abudefduf-lorenzi-STRI-X-6119	Papua New Guinea	Walindi Isl.	5925	411	x
Abudefduf-luridus-112559	Unknown		854	446	x
Abudefduf-luridus-112560	Unknown		1104	441
Abudefduf-hoefleri-STRI-X-6134		Cape Verde	1780	389
Abudefduf-hoefleri-STRI-X-6136		Cape Verde	448	391	x
Abudefduf-hoefleri-STRI-X-6512	Senegal	Yafar	3713	347
Abudefduf-natalensis-MNH28	South Africa	Sondwana Bay	994	401	x
Abudefduf-natalensis-MNH29	South Africa	Sondwana Bay	877	396
Abudefduf-margariteus-STRI-X-6123		Reunion	1408	447
Abudefduf-margariteus-STRI-X-6125		Reunion	1157	452	x
Abudefduf-notatus-STRI-X-6127		Christmas Island	569	437	x
Abudefduf-saxatilis-STRI-10000	Panama	Porto Bello	514	407
Abudefduf-saxatilis-STRI-10001	Panama	Porto Bello	585	417
Abudefduf-saxatilis-STRI-X-1063	Brazil	Abrolhos	708	321
Abudefduf-saxatilis-STRI-X-9897	Jamaica	Discovery Bay	796	375
Abudefduf-saxatilis-STRI-X-9898	Jamaica	Discovery Bay	515	428	x
Abudefduf-saxatilis-112095	Sao Tome and Principe	Sao Tome	914	420	x
Abudefduf-saxatilils-112112	Sao Tome and Principe	Sao Tome	670	369
Abudefduf-septemfasciatus-STRI-X-1154	Pacific	GBR - Liz. Isl	592	269	x
Abudefduf-sexfasciatus-STRI-X-1209		GBR-Lizard Isl. 2	581	303
Abudefduf-sexfasciatus-STRI-X-1245	PNG	Madang Lagoon	692	382	x
Abudefduf-sordidus-STRI-X-1251		Laulii, Tutuila Isl	1258	393
Abudefduf-sordidus-STRI-X-1280	Egypt	Sharm El Sheik	582	407	x
Abudefduf-sordidus-STRI-X-1297		Johnston Atoll	1001	400
Abudefduf-sparoides-STRI-X-6102		Reunion	1284	412
Abudefduf-sparoides-STRI-X-6168		Reunion	1197	415	x
Abudefduf-taurus-112342	Sao Tome and Principe	Sao Tome	968	414
Abudefduf-taurus-112360	Sao Tome and Principe	Sao Tome	1057	416
Abudefduf-taurus-112451		Cape Verde	753	433	x
Abudefduf-taurus-112456		Cape Verde	2605	420
Abudefduf-taurus-STRI-X-1307	Panama	Atlantic-Holandes	619	391
Abudefduf-taurus-STRI-X-1308	Panama	Atlantic-Holandes	1074	431
Abudefduf-taurus-STRI-X-1331	Venezuela	Roques-Cayo de Agua	536	411
Abudefduf-taurus-STRI-X-1332	Venezuela	Roques-Cayo de Agua	2272	430
Abudefduf-troschelii-STRI-X-1346	Clarion	Revillagigedos	828	379
Abudefduf-troschelii-STRI-X-1348	Costa Rica	Cocos	521	354
Abudefduf-troschelii-STRI-X-1349	Costa Rica	Cocos	1111	406
Abudefduf-troschelii-STRI-X-1371	Ecuador	Galapagos Bartolome	1600	416	x
Abudefduf-vaigiensis-STRI-X-1443	Pacific	GBR-Lizard Isl. 2	761	387	x
Abudefduf-vaigiensis-STRI-X-1497		Red Sea	1585	412	x
Abudefduf-vaigiensis-STRI-X-6065		Christmas Island	1578	422	x
Abudefduf-whitleyi-STRI-X-1535	Pacific	GBR-Lizard Isl. 2	764	390
Abudefduf-whitleyi-STRI-X-10350	New Caledonia	Noumea, Ste. Marie Bay	955	415	x
Chromis-atrilobata-stri-x-1783	East Pacific	Ecuador/Galapagos	529	390
Chromis-atrilobata-stri-x-1794	East Pacific	Cabo San Lucas	570	400	x
Chromis-multilineata-stri-x-1871	West Atlantic	Venezuela/ Roques	533	398
Chromis-multilineata-stri-x-9890	Carribean	Jamaica	648	401	x
